# Supplementary material
Source: Frontiers journal article supplement (https://www.frontiersin.org/articles/497169)
Supplement: Table_1.DOCX [file Table_1.DOCX]

# Supplementary Information

 
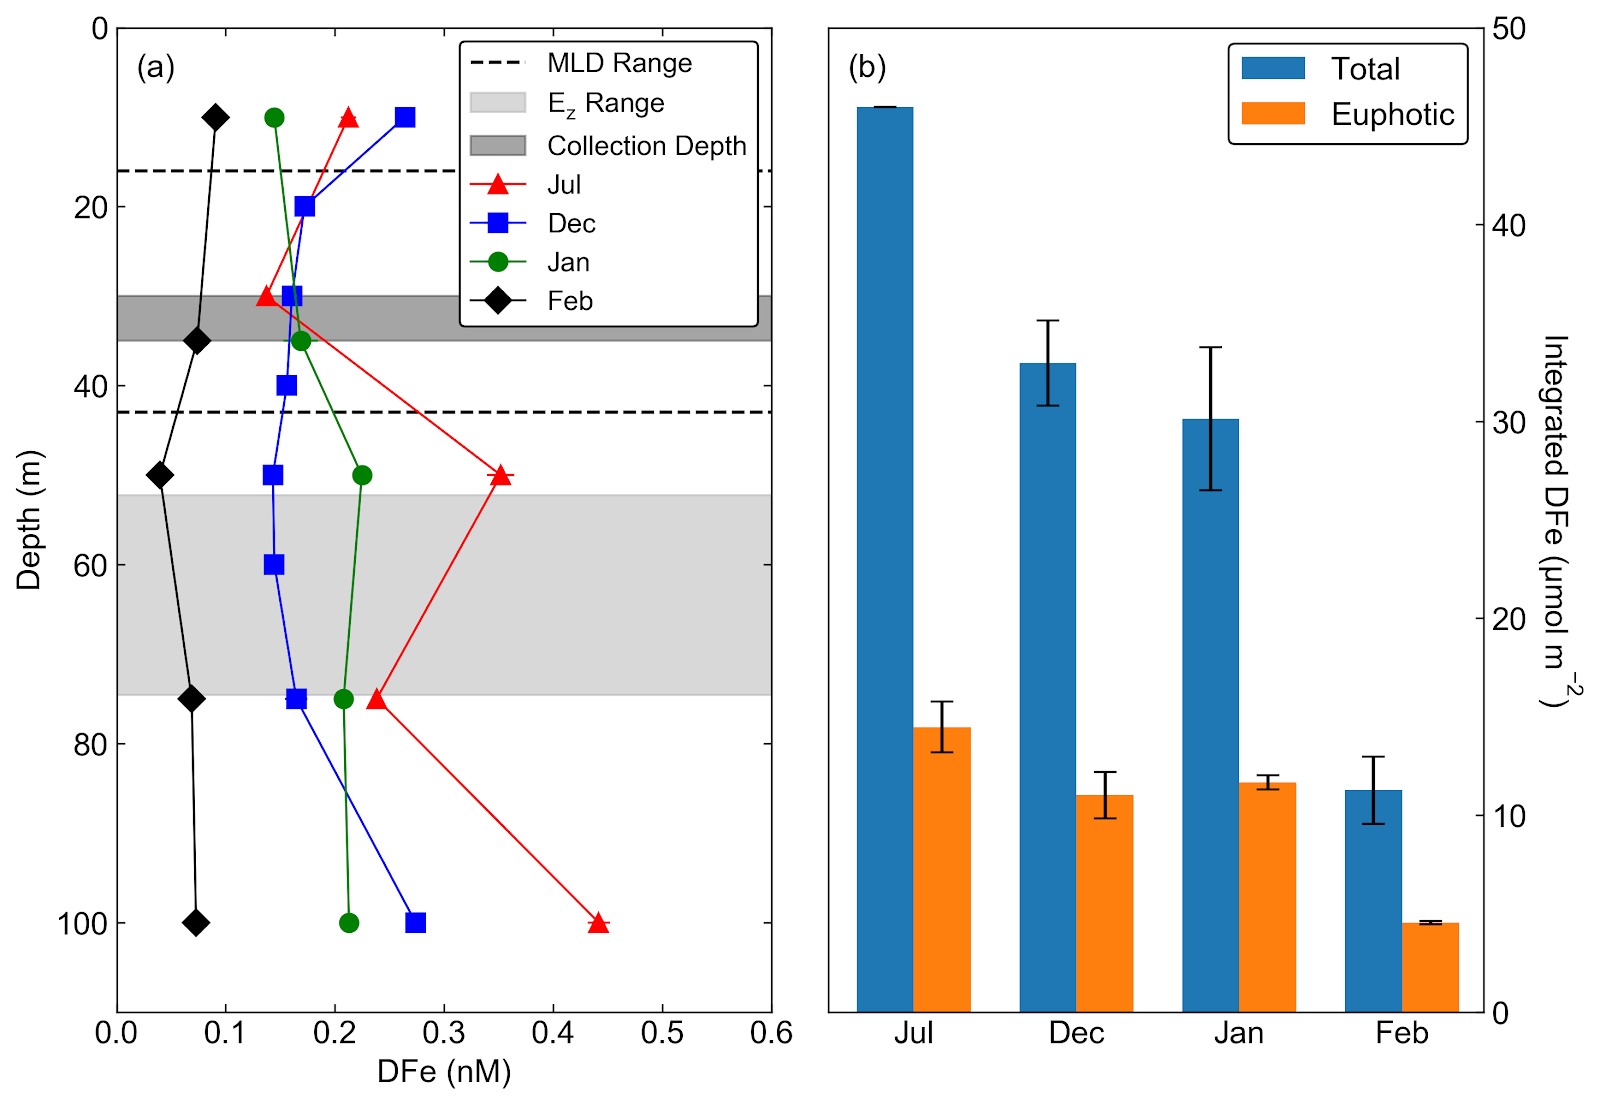


Figure S1: (a) Vertical profiles of dissolved iron (DFe, nM) with the summer range of the mixed layer depth (MLD), the summer range of the euphotic zone (Ez) and the experimental water depth collection. (b) The mean depth integrated DFe (μmol m-2) with ± standard deviations between total and euphotic reservoirs. Redrawn from Mtshali et al. (2019).


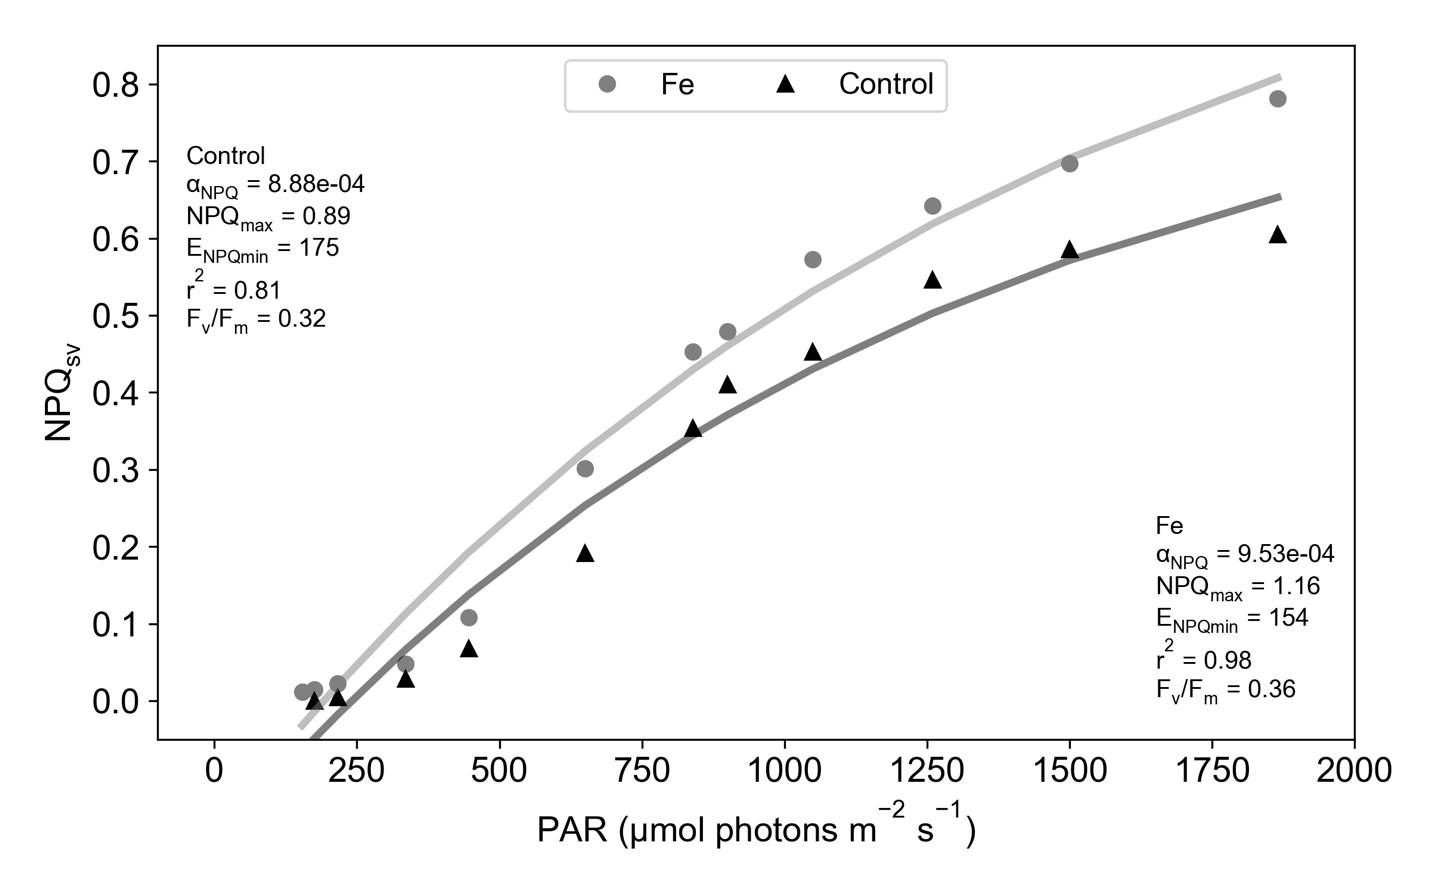


Figure S2: Example NPQsv corrected for ENPQmin fitted with the Platt et al. (1980) model from the iron and control treatments of nutrient addition incubation experiment 1 measured at 120 hours from Ryan-Keogh et al. (2018).


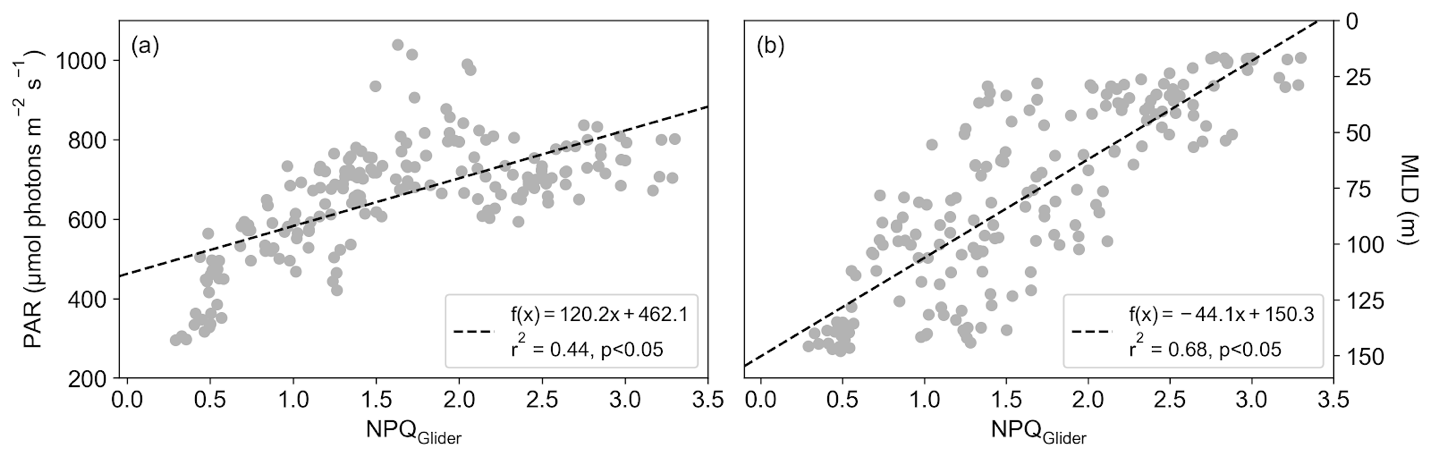


Figure S3: Linear regressions of daily surface NPQGlider against (a) daily surface PAR (μmol photons m-2 s-1) and (b) daily MLD (m).

Figure S4: Quality controlled (a) αNPQ and (b) NPQmax calculated from the depth profiles of NPQGlider versus in situ PAR (μmol photons m-2 s-1); displayed is the raw data and a 7-day rolling mean. The transition from Winter to Summer is defined as the 26th November 2015, when the net heat flux became positive according to du Plessis et al. (2019).

 
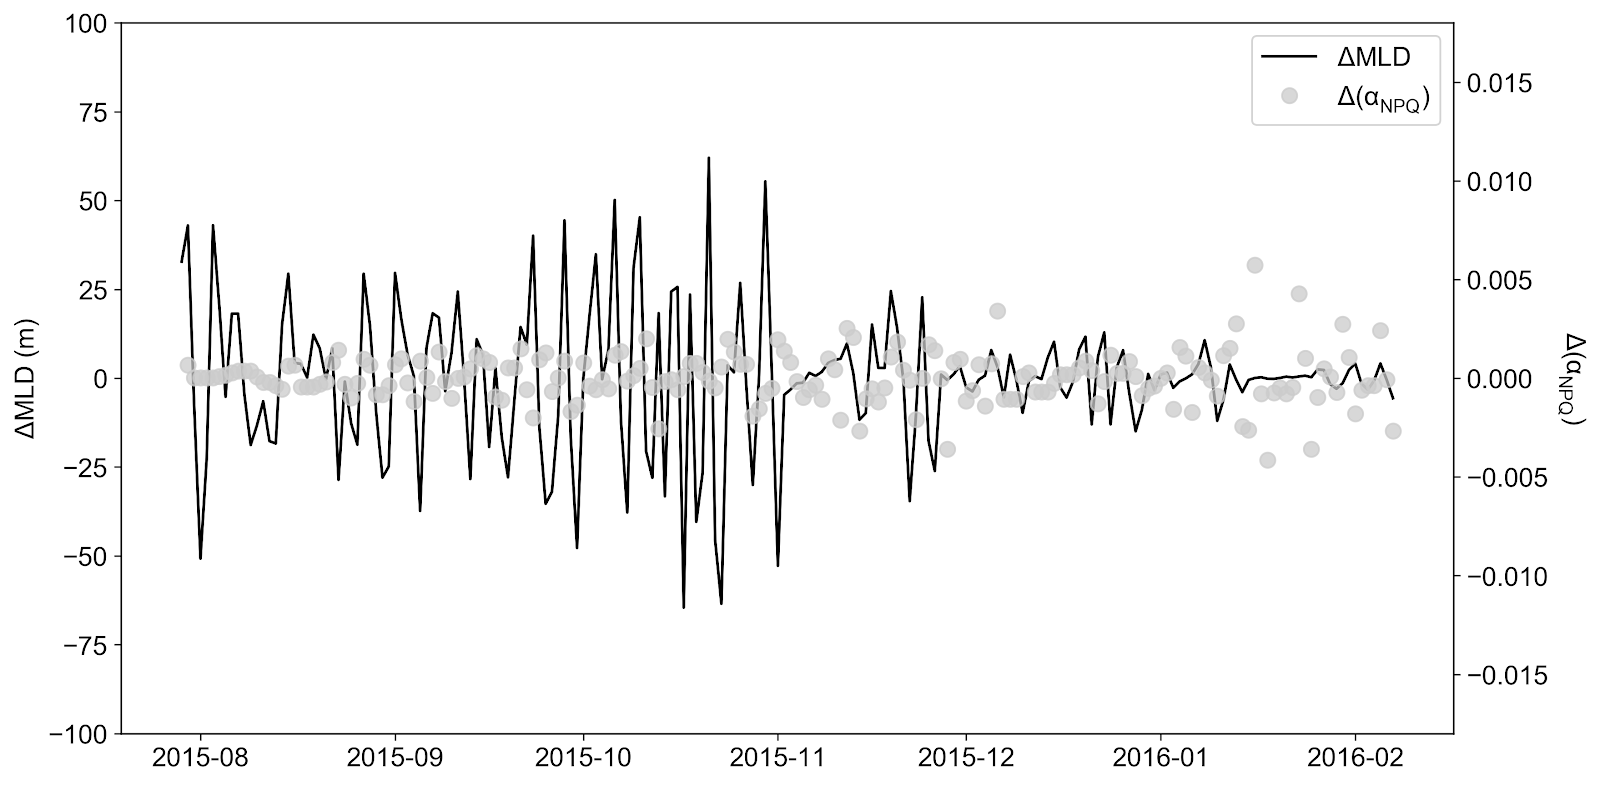


Figure S5: Time-series of the daily difference in MLD (m) and the daily difference in αNPQ.

Table S1: Temporal modes of variability and coefficient of determination (r2) defining the explained variance for each of the IMFs calculated for the summer time series with daily and seasonal signal removed for surface chlorophyll-a, MLD and αNPQ (linear interpolation and MLD regression). The dominant signal is in italics and shaded grey, with all significant correlations (p<0.01) in bold and underlined.

|  | Chl-a | | MLD | | αNPQ (linear) | | αNPQ (regression) | |
| --- | --- | --- | --- | --- | --- | --- | --- | --- |
| IMF | Time scale | r2 | Time scale | r2 | Time scale | r2 | Time scale | r2 |
| 1 | **2.8** | **18%** | 2.9 | 5% | **3.4** | **26%** | ***3.0*** | ***28%*** |
| 2 | ***6.1*** | ***24%*** | **7.1** | **14%** | ***6.1*** | ***27%*** | **4.8** | **18%** |
| 3 | ***17.0*** | ***24%*** | 11.0 | 7% | 10.5 | 2% | 8.9 | 9% |
| 4 | **24.0** | **15%** | ***Residual*** | ***65%*** | 23.0 | 5% | 19.0 | 2% |
| 5 | 28.5 | 9% |  |  | ***28.0*** | ***6%*** | 29.0 | 4% |
| 6 | 60.0 | 0% |  |  | Residual | 1% | 58.0 | 0% |
| 7 | Residual | 0% |  |  |  |  | Residual | 0% |
